# Supplementary material
Source: publisher site journal article supplement (https://www.dovepress.com/get_supplementary_file.php?f=237435.xlsx)
Supplement: Supplementary file 1 [file get_supplementary_file.php]

## Sheet: Patient characteristics
																			Postoperative Adverse Events
	Age		Height		Weigh		ASA status		Surgical side		Duration of surgery (min)		Duration of anesthesia(min)		24h morphine equivalent consumption (mg		Time to PACU discharge (min)		Nausea		Vomiting		Pruritus		Serious respiratory depression		Pneumothorax		Dizziness
Patient ID	PS	PSP	PS	PSP	PS	PSP	PS	PSP	PS	PSP	PS	PSP	PS	PSP	PS	PSP	PS	PSP	PS	PSP	PS	PSP	PS	PSP	PS	PSP	PS	PSP	PS	PSP
1	43	48	158	161	66	55	1	1	left	right	130	120	150	140	45	46	55	60	Yes	No	Yes	No	No	No	No	No	No	No	No	No
2	47	51	155	165	61	67	2	1	left	left	110	120	140	150	40	45	50	45	No	Yes	No	Yes	No	No	No	No	No	No	No	Yes
3	54	58	167	166	65	65	1	2	right	right	145	70	175	120	72	45	30	54	Yes	No	No	No	No	No	No	No	No	No	No	No
4	40	49	162	170	68	60	2	2	right	right	100	45	115	80	57	35	44	60	No	Yes	No	No	Yes	No	No	No	No	No	No	No
5	51	45	163	164	51	45	1	2	left	left	85	130	120	145	67	41	60	75	Yes	No	Yes	No	No	No	No	No	No	No	No	No
6	59	62	167	164	51.5	69	2	2	right	left	135	115	145	140	55	32	60	50	No	No	No	No	No	No	No	No	No	No	No	No
7	55	48	161	167	68	55	2	2	right	right	90	200	125	225	47	46	60	40	No	Yes	No	No	No	No	No	No	No	No	Yes	No
8	50	55	158	161	68	49.5	2	2	right	left	130	95	160	125	47	38	60	55	Yes	Yes	No	Yes	No	No	No	No	No	No	No	No
9	48	46	157	158	54	60	1	2	left	left	100	180	125	190	47	40	60	30	Yes	No	Yes	No	No	No	No	No	No	No	No	No
10	44	57	162	164	55	60	1	2	right	right	90	190	135	205	42	43	60	20	No	No	No	No	Yes	No	No	No	No	No	No	No
11	65	52	168	151	50	44	1	2	right	left	145	145	185	170	37	36	65	55	No	No	No	No	No	No	No	No	No	No	No	No
12	59	47	163	164	55	60	2	2	left	right	105	180	140	205	30	42	65	62	No	Yes	No	Yes	No	No	No	No	No	No	No	No
13	48	36	161	158	61	50	2	2	left	right	135	125	160	150	52	46	50	38	No	No	No	No	No	Yes	No	No	No	No	Yes	No
14	39	55	168	151	60	57	2	2	right	left	150	90	180	120	40	41	75	61	No	No	No	No	No	No	No	No	No	No	No	No
15	53	47	163	159	62	50	2	2	right	left	65	110	85	130	57	36	60	54	No	No	No	No	Yes	No	No	No	No	No	No	No
16	45	63	161	165	52	55	2	2	left	right	130	80	150	120	68	42	60	50	No	No	No	No	No	No	No	No	No	No	No	No
17	54	66	165	160	68	63	2	2	right	right	205	135	220	180	44	46	85	60	Yes	Yes	Yes	Yes	No	No	No	No	No	No	No	Yes
18	50	62	162	161	52	62	2	2	left	left	75	75	95	100	43	30	60	37	Yes	No	No	No	No	No	No	No	No	No	No	No
19	55	58	162	166	65	57	2	1	left	right	150	95	180	110	66	42	40	40	No	No	No	No	No	No	No	No	No	No	No	No
20	53	45	162	165	62	58	2	1	right	left	115	115	140	130	67	38	55	45	No	No	No	No	No	No	No	No	No	No	No	No
21	49	39	165	167	60	62	2	1	left	left	120	85	145	100	45	35	45	35	No	No	No	No	No	No	No	No	No	No	No	No
22	45	42	163	163	73	68	2	1	right	left	140	140	165	170	49	47	30	46	Yes	No	Yes	No	No	No	No	No	No	No	No	No
23	48	45	172	158	42	70	2	1	right	right	140	80	160	100	50.5	61	30	32	No	Yes	No	Yes	No	No	No	No	No	No	No	No
24	38	43	161	157	65	45	2	1	right	left	90	100	115	118	48	35	50	30	No	No	No	No	Yes	No	No	No	No	No	No	No
25	41	42	165	155	58	49	2	1	right	right	165	55	185	80	61	33	30	42	Yes	No	No	No	No	No	No	No	No	No	No	No
26	59	46	162	163	55	43	1	1	left	left	119	140	166	160	55	51	40	35	No	No	No	No	No	Yes	No	No	No	No	No	No
27	62	49	160	155	55	62	1	2	right	right	108	125	145	175	69	33	45	48	No	Yes	No	Yes	No	No	No	No	No	No	No	Yes
28	66	53	157	158	52	57	1	1	left	right	110	156	122	185	72	42	50	35	No	No	No	No	No	No	No	No	No	No	No	No
29	69	55	163	151	49	62	1	2	right	left	105	105	149	125	48	32	42	55	Yes	No	Yes	No	No	No	No	No	No	No	No	No
30	55	57	165	155	50	65	2	1	left	right	121	190	152	205	43	39	60	40	No	Yes	No	Yes	No	No	No	No	No	No	No	No
31	48	61	156	159	46	58	1	1	left	left	139	200	158	215	59	40	73	38	No	No	No	No	No	No	No	No	No	No	No	No

## Sheet: NRS
	NRS score during inactive period													NRS score during inactive period
	PS	PSP	PS	PSP	PS	PSP	PS	PSP	PS	PSP	PS	PSP		PS	PSP	PS	PSP	PS	PSP	PS	PSP	PS	PSP	PS	PSP
Patient ID	1h	1h	3h	3h	6h	6h	12h	12h	24h	24h	48h	48h		1h	1h	3h	3h	6h	6h	12h	12h	24h	24h	48h	48h
1	0	3	0	0	0	0	0	0	0	0	0	0		0	3	0	0	0	0	0	0	0	0	0	0
2	2	3	0	2	0	2	0	3	0	2	0	0		2	3	0	2	0	2	0	3	0	2	1	2
3	0	0	0	0	0	0	1	0	2	0	0	0		0	0	1	0	1	0	2	0	2	2	2	2
4	0	4	0	0	0	0	0	0	0	0	0	0		0	4	0	0	0	0	1	0	3	0	2	0
5	0	0	0	0	0	0	0	2	0	0	0	0		0	0	0	0	0	0	0	2	0	2	1	0
6	1	0	1	0	1	0	2	0	0	0	0	0		2	0	2	0	3	0	3	0	1	0	1	0
7	0	4	0	2	0	2	0	2	0	4	0	4		0	4	0	2	0	2	1	2	2	4	2	4
8	1	0	0	1	0	1	0	1	0	0	0	0		2	0	2	1	3	1	2	1	5	1	3	0
9	1	1	1	0	2	0	2	0	0	0	0	0		3	1	4	0	3	0	4	0	2	4	0	0
10	2	2	2	2	2	2	1	4	0	2	0	2		2	2	2	2	2	2	1	4	4	2	0	2
11	1	0	1	0	2	0	3	0	1	0	0	0		2	0	2	0	3	1	3	1	3	1	3	2
12	2	0	2	0	2	0	3	0	2	0	2	0		2	0	2	1	3	1	3	1	4	2	2	3
13	1	1	1	1	1	1	1	1	0	1	0	0		3	1	2	1	3	1	2	1	3	1	2	0
14	1	0	1	0	1	0	1	0	0	0	0	0		2	0	2	0	3	0	2	0	2	0	2	0
15	1	1	1	1	0	1	0	1	0	0	0	0		2	1	3	2	4	2	3	1	2	0	2	0
16	0	2	1	3	0	4	1	3	0	4	0	3		0	2	1	3	3	5	4	3	4	5	0	3
17	2	0	2	0	2	0	2	0	3	0	0	0		2	0	3	0	4	0	3	1	3	2	3	3
18	0	0	0	0	0	0	0	0	0	0	0	2		0	0	1	0	0	0	0	2	0	3	4	3
19	2	0	1	0	2	0	3	0	2	0	4	0		4	0	3	0	3	0	4	0	3	0	5	0
20	1	0	2	0	3	0	0	0	0	0	1	0		3	0	2	0	4	0	0	0	0	0	4	0
21	0	1	1	2	1	2	1	2	1	2	0	2		0	1	1	2	1	2	1	2	1	2	2	3
22	2	0	1	0	0	0	1	0	2	0	1	0		3	0	2	0	2	0	3	0	4	0	3	0
23	1	1	2	1	0	1	0	1	0	1	0	1		1	1	2	1	2	2	2	2	2	2	0	2
24	2	1	3	1	3	1	2	1	1	1	0	1		3	2	4	2	4	2	3	2	2	2	2	2
25	2	0	2	0	0	0	0	0	0	0	0	0		4	1	2	1	3	1	2	1	3	1	3	1
26	3	1	2	1	2	1	2	1	2	1	1	1		3	1	2	1	2	1	2	1	3	1	1	1
27	2	0	2	0	2	0	2	0	2	0	1	0		3	1	2	1	2	1	2	1	3	1	2	1
28	2	1	2	1	2	1	2	1	2	1	0	1		3	1	3	1	2	1	2	1	2	2	1	2
29	2	0	2	0	3	0	2	0	2	0	1	0		3	0	4	0	4	0	4	0	2	0	2	0
30	3	2	1	2	2	2	3	2	2	3	0	3		4	2	3	2	4	3	4	4	2	3	3	3
31	3	0	2	0	2	0	3	0	1	0	0	0		2	0	2	0	2	0	3	0	1	0	4	0
